# Supplementary material
Source: PubMed Central journal article supplement (PMC10355979)

## Supplementary Figure S1

### A) Sequences for 5 homomorphic HIST1H2B variants, and for HIST2H2BE

#### HIST1H2BC

TGGGTGGCTCTTAAAAGAGCCTTTGGGGTTAGGTGTTAAGACGCTTACTT  
GGAATGTTTACTTGGAGCTGGTGTACTTGGTGACGGCCTTGGTGCCCTCC  
GACACGGCGTGCTTGGCCAGCTCTCCGGGAAGCAGCAGGCGCACGGCCGT  
CTGGATCTCCCTGGAGGTGATGGTTCGAGCGCTTGTGTAAATGCGCCAGGC  
GGGAAGCCTCGCCCCGCGATGCGCTCAAATATGTCGTTAACGAAAGAATTC  
ATGATGCCCCATGGCCTTGGGAAGAGATGCCAGTGTCCGGATGGACCTGTTT  
CAGCACCTTGTACACGTACACAGAGTAACTCTCCTTGC GGCTGCGCTTGC  
GCTTCTTGCCATCTTTCTTCTGCGCTTTGGTCACTGCCTTCTTGAGCCC  
TTCTTCGGGGCGGGAGCAGACTTGGCTGGCTCAGGCAT

#### HIST1H2BE

ATGCCTGAGCCAGCGAAATCCGCTCCCGCCCCGAAGAAGGGCTCCAAGAA  
GGCCGTGACCAAGGCGCAGAAGAAGGACGGCAAGAAGCGCAAGCGCAGCC  
GCAAGGAGAGCTACTCCGTATACGTGTACAAGGTGCTGAAACAGGTCCAC  
CCCGACACCGGCATCTCCTCTAAAGCCATGGGGATCATGAATTCCTTTGT  
CAACGACATCTTCGAGCGCATCGCCGGCGAGGCTTCCCGCCTGGCGCATT  
ACAACAAGCGCTCGACCATCACCTCCAGGGAGATCCAGACGGCCGTGCGC  
CTGCTGCTTCCCGGGGAGCTGGCCAAGCACGCTGTGTGTCAGAGGGCACCAA  
GGCCGTTACCAAGTACACCAGCTCCAAGTAAACTTGTCCCTGCAACTGCC  
TTAGTAAACCCAAAGGCTCTTTTCAGAGCCACTCA

#### HIST1H2BF

ATGCCTGAACCTGCTAAGTCCGCTCCTGCTCCAAAAAAGGGCTCCAAAAA  
GGCGGTGACCAAGGCGCAGAAGAAGGATGGTAAGAAGCGCAAGCGTAGCC  
GCAAGGAGAGCTATTCCGTGTACGTGTACAAGGTGCTAAAGCAGGTCCAC  
CCCGACACCGGCATCTCATCCAAGGCCATGGGCATCATGAACTCCTTCGT  
CAACGATATCTTCGAGCGCATCGCTGGCGAGGCTTCCCGCCTGGCGCATT  
ACAACAAGCGCTCCACCATCACCTCCAGGGAGATCCAGACGGCCGTACGC  
CTGCTGCTGCCCCGGGAGCTGGCTAAGCACGCCGTGTGTCAGAGGGCACCAA  
GGCCGTCACCAAGTACACCAGCTCTAAGTAATTCTAACGTCTTCATAACC  
AATCCCAAAGGCTCTTTTAAGAGCCACCCA

#### HIST1H2BG

TTTATGTGAGACTTGAGTGGCTCTGAAAAGAGCCTTTGAGTTTTAAAGCA  
CCTAAGCACACATTTACTTGGAGCTTGTATACTTGGTGACAGCCTTGGTA  
CCTTCGGACACTGCGTGCTTGGCCAGCTCTCCGGGAAGCAGCAGACGCAC  
GGCGGTCTGGATCTCCCTGGAGGTAATGGTCGAGCGCTTGTGTAGTGGG  
CCAGACGGGAAGCCTCGCCTGCGATGCGTTCGAAGATGTCGTTAACGAAG  
GAATTCATGATGCCATGGCCTTGGATGAGATGCCAGTATCGGGGTGAAC  
CTGTTTTAGCACCTTGTACACATACACGGAGTAGCTCTCCTTACGACTGC  
GCTTGCCTTCTTGCCATCCTTCTTCTGCGCCTTGGTACAGCCTTCTTG  
GAACCCTTCTTCGGAGCAGGAGCTGACTTAGCTGGTTCAGGCATG

## HIST1H2BI

ATGCCTGAACCAGCTAAGTCAGCTCCCGCCCCGAAGAAGGGCTCCAAGAA  
GGCGGTGACCAAGGCACAGAAGAAGGATGGCAAGAAGCGCAAGCGCAGCC  
GCAAGGAGAGCTATTCCGTGTACGTGTACAAGGTGCTGAAGCAGGTCCAC  
CCCGACACCGGCATCTCGTCCAAGGCTATGGGGATTATGAACTCCTTCGT  
CAACGACATTTTCGAGCGCATTGCAGGCGAGGCTTCCCGCCTGGCGCATT  
ATAACAAGCGCTCGACCATCACTTCCAGGGAGATCCAAACGGCTGTGCGC  
CTGCTGCTACCCGGGGAGCTGGCCAAACACGCGGTGTGCGAGGGCACCAA  
GGCGGTACCAAGTACACCAGCTCCAAGTAACTAGTTACCTGGGTAAAA  
GCGCTAACGACCCAAAGGCTCTTCTAAGAGCCACCCA

## HIST2HB2E

TTAAATTAATTGGTAACTTTATTAATAACAATAGCATCTATACACATTTG  
AAAACACACATGTAGGAGACAGTTAAGATCTATTTCAGTCTGTGATAATGT  
CTAGAGCTCATTTGGATTTCATCAAACCCCTGCCATCAGCTCCAAAAGCCC  
TTAGCCAAAAACAGCTGAATCACTCATCAAACCATCAGTGTCTTCTTCGG  
CAGAATCAAGGGTTGGACAGAAAGAGTAAATATTCTGCACCTCCACAAAA  
TAAACTAAAATGCAATTGTCTGCATCTGAGAATACAAGGGTGGACAGT  
ATGAGCTGCATGACTGTGAACCAATGAGGCTTCTCTTGGCCTCATTTGTA  
AAAAGGAGATTAACCTCTGTAGTCCCGCCTATATTGCATGGCCTCCAGAAA  
AGCAAATGAGGTGGTAAGTGTAATTTAAAAGCTCCTCTCCTTTAAGAGGG  
GAACACCATGAGGGGAGAGTAAGAAAAGGAGAAGGAAAAGGCTCTTTCCA  
GTGACCAACACGCTGAATTTGATGAAAATCCATAAGAGGTTATGCTAAAC  
TGAGAAGCATAAGGGTGGATCTACCATTGCCACCTCCTCTTTGTAGCAAA  
AAAAATCTTAACACGGCCCCCTCCCAGCTGTTGCACTGAGGTGACTAAGG  
ATACATTTTGGAGGAAGTAGCTCCAAGAACATTTCCATTTTCACTGTGCCT  
TCACATACATCTAATGGAAATGAACAGCACCCCTTCATCCATCCACGGAAG  
CGATTAAGAAAAGGGTGGGATGGAAAAATTAACCCAACAATATTAGATCA  
ATACGTAGTATTTAAGTGTCCATAATGTGCCAGGCTGAAGATGCACGGGA  
AAACCACACTAGCCGGTCTGTCAAGGGCTTGAGAATACCATAAACAAGAA  
AACAGACGAACCAATTTTCAGACAGCTGCTAGAAGGAAGATAAAATGAGAC  
AGGCAAGTATGAGAGGCGCAATTCCTGAGTGGATGACGTAGGTCTCTGA  
GAGGTGACTTTTTGAGCCCGTATCTACATGGTAAGTGCCTCGCAGTGACCT  
GGGGCCGTAGCGTTACCATTTAAAGCACAGACCATTAATGCAGAAATTA  
TCAACAAAATGAGAAATAGGAATTTCAAAGTCTCAAAGTGAACGACGGAA  
ACTGAAATCTACAAATTAGAAAAAGGCGCAGAATTTTGAATATTCTTGTC  
GCCCAATCAGGACAAGGCTGGGACCCGGCTGCGCGGCCTTCGTCCAAAAT  
ACACAGAACGGCTGGTATCCACAGGAGGCCCATCGCACGGCAGAACTGG  
TGACCGGACACAAAAGCTGCTGCCAAGCGTCAGTCATACAGAGCTGTCAC  
GCAGTGTTTGCGGAACCCGGGCTGAATTTGTGTCCTGGAGTTCTCTTAAAT  
GACAGCCGAACCTCAGCCACTTCGTTTTAGAATGAAACAGACCCAAGGAGC  
CACCAGGGCGCGTGTGGGGCGGGAGTGGGGCGGGTAAAGAGGCGGATTTC  
CCAACAGCCTAATTGAGAACCGACTCCTGGGAAGGCTAAGCAGCACAATG  
AGTAAAGACACGCTCTAGATTTCAAAGCAAATCCAATGACGCACTGGGGA  
CCTCGAGTTCCAAATAGTTAAAAAGCTACGTATGCCATTTCCCATGACCT  
TCACACTAAAATAACTTACTTTATGAAAAGAACTAAGGGAATAAGTGAA  
CAAGCTCTTTTCTAGTGATTAGGTGGGTGGCTCTGAAAAGAGCCTTTGGA  
GTCAAGCAGCCGGCGACTCGAGCGAGCGAGCGCCAGGTCCCGGCAGGGAC  
TCACTTGGAGCTGGTGTACTTGGTGACCGCCTTGGTGCCCTCGGACACGG  
CGTGCTTGGCCAGCTCGCCGGGCAGCAGCAGGCGCACGGCCGTCTGGATC  
TCGCGGGATGTGATGGTGGAGCGCTTGTGTAGTGCGCCAGGCGGGAAGC

CTCTCCCGCGATGCGCTCGAAGATGTCGTTGACGAAGGAGTTCATGATGC  
 CCATGGCCTTGGACGAGATGCCGGTGTCTGGGGTGGACCTGCTTCAGCACC  
 TTGTACACGTAGATGGAGTAGCTCTCTTTGCGGCTGCGCTTTCGCTTCTT  
 GCCGTCTTTCTTCTGGGCTTTGGTGACGGCTTTCTTGGAGCCCTTTTTAG  
 GGGCCGGAGCGGATTTTGGCCGGTTCAGGCATGGTAAGACACAGTACAAAC  
 GCGGCTTAGCCAAGAAAAGAAGT

B) Alignment of HIST1H2BC/E/F/G/I and HIST2H2BE

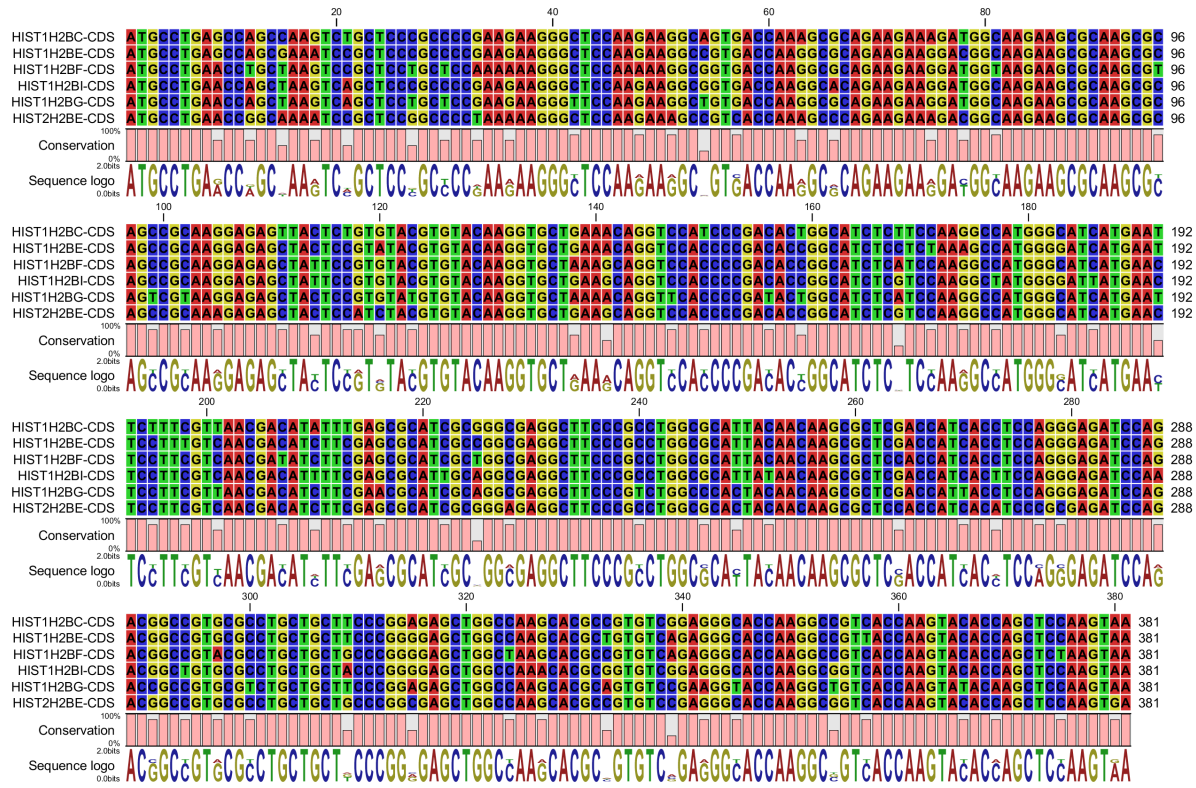

C) Amino acid sequence of HIST1H2BC/E/F/G/I and HIST2H2BE

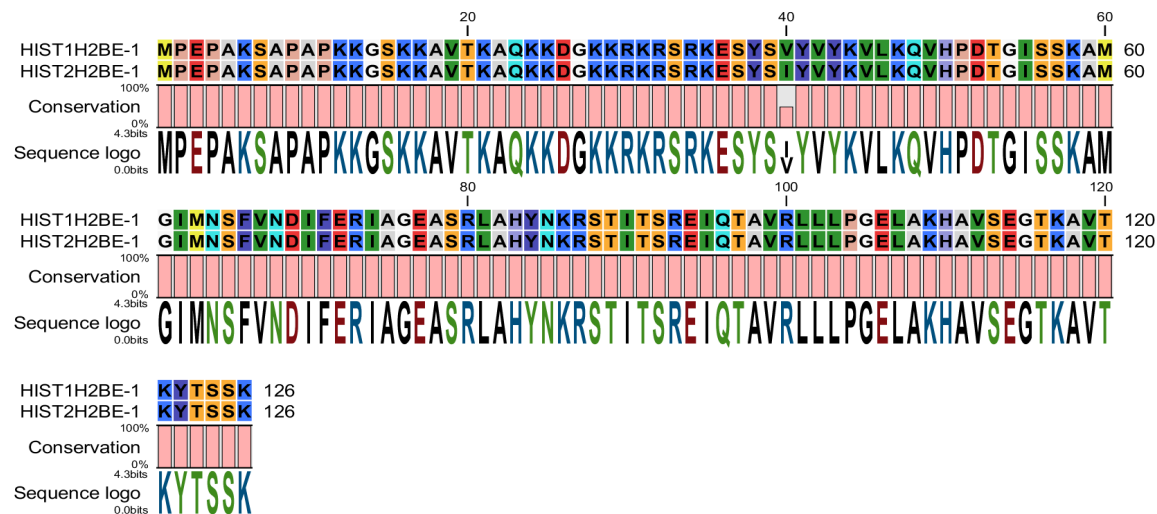

### D) Alignment of HIST1H2BE and HIST2H2BE

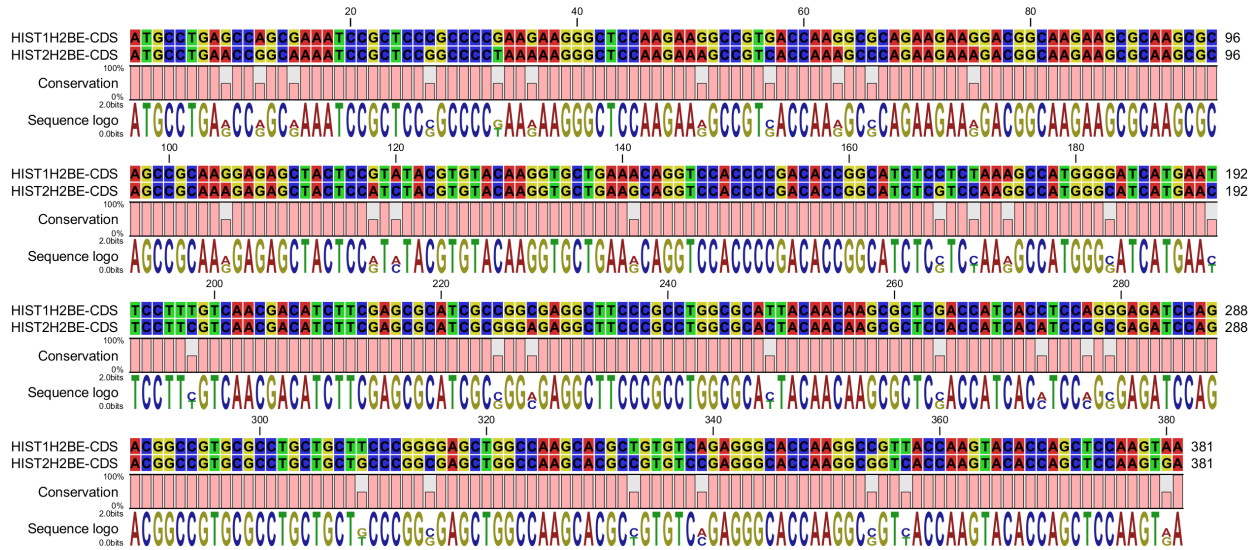

Supplement: 12672_2015_230_MOESM1_ESM.pdf [file 12672_2015_230_MOESM1_ESM.pdf]
