# Supplementary material
Source: PubMed Central journal article supplement (PMC10355979)

# S3A

**HIST1H1B**  
Q=0.007

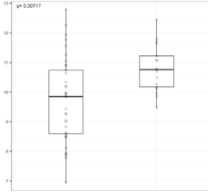

**HIST1H1D**  
q=0.001

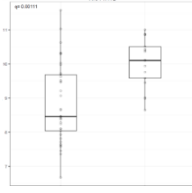

**HIST1H2AE**  
q=0.0003

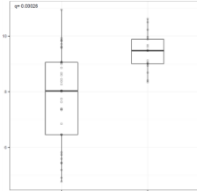

**HIST1H2AI**  
Q=0.005

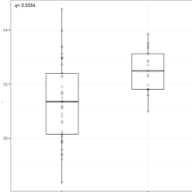

**HIST1H2AJ**  
α=0.05

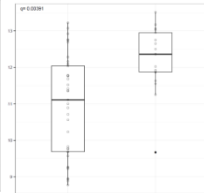

**HIST1H2AL**  
α=0.009

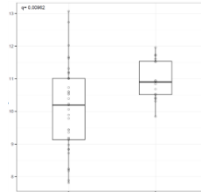

**HIST1H2AM**  
α=0.02

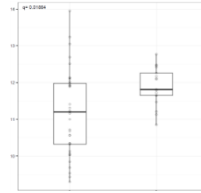

**HIST1H2BF**  
q=0.005

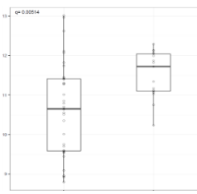

**HIST1H2BG**  
q=0.03

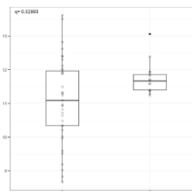

**HIST1H2BH**  
α=0.0004

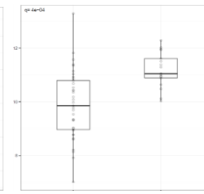

**HIST1H2BK**  
q=0.02

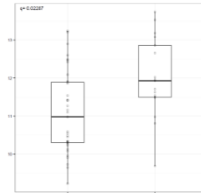

**HIST1H2BL**  
q=0.048

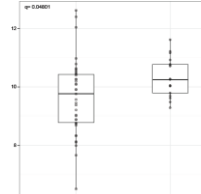

**HIST1H2BM**  
q=0.03

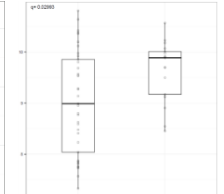

**HIST1H3B**  
α=0.03

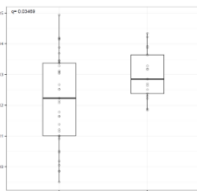

**HIST1H3E**  
q=0.009

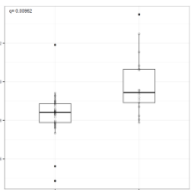

**HIST1H3D**  
q=0.004

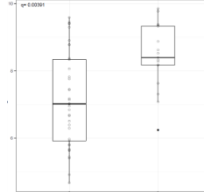

**HIST1H3F**  
q=0.0002

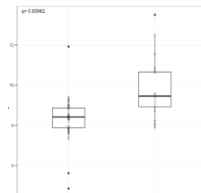

**HIST1H3G**  
q=0.01

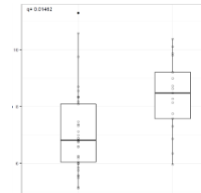

**HIST1H3H**  
q=0.015

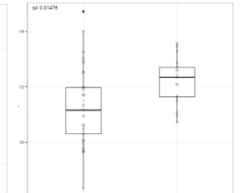

**HIST1H4K**  
q=0.02

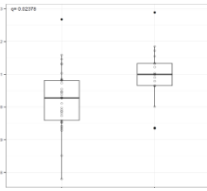

**HIST2H3C**  
q=0.09

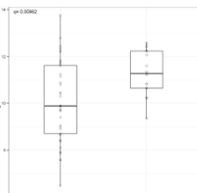

Supplement: 12672_2015_230_MOESM3_ESM.pdf [file 12672_2015_230_MOESM3_ESM.pdf]
