# Supplementary material
Source: PubMed Central journal article supplement (PMC10355979)
Supplement: 12672_2015_230_MOESM6_ESM.pdf [file 12672_2015_230_MOESM6_ESM.pdf]

**Table S1: Primer Sequences and Annealing temperatures, PCR for sequencing analysis**

| Gene      | Forward              | Reverse                       | T <sub>a</sub> |
|-----------|----------------------|-------------------------------|----------------|
| HIST1H2BC | CAAATAAAATTTGGCGTCTG | TAGCAGAAATCCGCTCTTTA          | 55             |
| HIST1H2BE | AACTGCAGAACAGCAAAGAT | TAGCTCCAATTGTGAAAAGG          | 55             |
| HIST1H2BF | TTAGGTTGTGGACGAAGTGT | GAAAATATGCAGGTAATTACA<br>ACTC | 55             |
| HIST1H2BG | TTCCCTAGAAAACGGTGAA  | TCATTCTCACTGCTGTTATTGT        | 55             |
| HIST1H2BI | CTGTGGTCATTTGACGGTAT | TGCCAAGTCTGGAAAATTAC          | 55             |

**Table S2: Primer Sequences and Annealing temperatures, Bisulfite Sequencing**

| Gene                             | Forward                          | Reverse                     | T <sub>a</sub> |
|----------------------------------|----------------------------------|-----------------------------|----------------|
| HIST1H2BE_ CpG 1<br>-179 to +184 | TTTTAGGATATGATTAA<br>TGGGAGAGTAG | TCCCATAACTTTAAAAAAA<br>TACC | 54             |
| HIST1H2BE_ CpG 2<br>+179 to +545 | TGGGGATTATGAATTTT<br>TTTGTTAA    | CACCAACCCAAACAATAAATA<br>CC | 54             |

**Table S3: Primer Sequences, Q-RT-PCR**

| Gene       | Forward               | Reverse                |
|------------|-----------------------|------------------------|
| HIST1H2BC  | ACAAGGTGCTGAAACAGGTC  | CGATGCGCTCAAATATGTCG   |
| HIST1H2BE  | AAGCACGCTGTGTCAGAG    | CAGTTGCAGGGACAAGTTTAC  |
| HIST1H2BF  | TCCAGGGAGATCCAGACG    | TTGGGATTGGGTATGAAGACG  |
| HIST1H2BG  | ATGCCTGAACCAGCTAAGTC  | GTGAACCTGTTTTAGCACCTTG |
| HIST1H2BI  | ACGTGTACAAGGTGCTGAAG  | GGAGTTCATAATCCCCATAGCC |
| HIST1H3A   | TCGTAAACTACCTTTCCAGCG | GTCCTCAAATAGCCCTACCAAG |
| HIST1H3C   | AAGAAACCTCATCGCTACCG  | AGGTCGGTTTTGAAGTCCTG   |
| HIST1H4D   | GGAAAATGTAATCCGCGATGC | CCATAAAGAGTGCGTCCCTG   |
| Beta Actin | CCCTGGCACCCAGCAC      | GCCGATCCACACGGAGTAC    |
| RPS11      | CTACAAGAACATCGGTCTGGG | ATGGTCCTCTGCATCTTCATC  |
| UBB        | TTGGTGATTGGCAGGATCC   | TTTCGATGGTGTCACTGGG    |
| GAPDH      | ACATCGCTCAGACACCATG   | TGTAGTTGAGGTCAATGAAGGG |

**Table S4: Target Sequences for stable clones**

| Stable Clone  | Forward Target Sequence                    | Reverse Target Sequence             |
|---------------|--------------------------------------------|-------------------------------------|
| sh1           | CGGCATCTCCTCTAAAGCCAT                      |                                     |
| sh2           | CGTGACCAAGGCGCAGAAGAA                      |                                     |
| sh3           | GAATTCCTTTGTCAACGACAT                      |                                     |
| CDS HIST1H2BE | AAAGCGGCCGCAACTTGGAGCT<br>GGTGTACTTGGTAACG | AAAGGATCCATGCCTGAGCCAGCG<br>AAATCCG |

**Table S5: Histone variants queried in Nanostring analysis.**

| Gene          | Probe                                                                                                       |
|---------------|-------------------------------------------------------------------------------------------------------------|
| H1F0          | TTTGTTTTGCTATTAACCTACTTACGGGGTTAGGGATTTGCGGGGGGGGCTTGTGTGTTTTGTTGGCTTGTGGCCATGAAGGTAG<br>ATGTGGGTGGGGAG     |
| H1FOO         | GGCTCCTGGGAGCGTCACCAGCGACATCTCACCTCCTCGACTTCCACAGCAGGATCATCCAGGTCTCCTGAATCTGAAAAGCCA<br>GGCCCGAGCCACGGC     |
| H1FX          | CCCACCTCCTTGCCTTTGGGTGCGCGACAAACAATCGCTCCGGGCTCAGGGCTGCGCGGGCTCTTCCCTTCAATCCATGGGCCTTT<br>TTTTGGGCACAATA    |
| H2AFB2        | TGCTGGCGGCCGGGGGCGGACCTGCTCTCGCACCGTCCGAGCGGAGCTTTCGTTTTCACTGAGCCAGGTGGAGCGCAGTCTACGG<br>GAGGGCCACTACGCT    |
| H2AFJ         | CCCTGGGAAGATTACAGGAATCTGTCCAGCTCTTATTACATGATGAGCAACATAGACAAGATACGAGGCATTGTAAGTGCCTG<br>TCGCCACCCGCTCT       |
| H2AFV         | TGCAGAGTGTCTACTGACCAAGAAAGTTGTGCTGCCACATTATAGATGTGGAGCCTAAGGGTACAGAAATTGTGTGCTATGC<br>CAAAAAACATTGAAC       |
| H2AFX         | CCGCCCCATTCCCTTCCAGCAAACCTCAACTCGGCAATCCAAGCACCTAGATACCAGCACAAAGTCGGTTAATCCCTGTCTGGACT<br>GAGCCTCCGTTGGCT   |
| H2AFY         | TGACCTAGGAAACACGCTGGAGAAGAAAGGTGGCAAGGAGTTTGTGGAAGCTGTCTGGAAGTCCGGAAAAAGAACGGGCCCTT<br>GGAAGTAGCTGGAGCT     |
| H2AFY2        | ACAGAAGCTGTCTTAACCCAGAGTGACATCAGCCATATTGGCTCCATGAGAGTGGAGGGCATTGTCCACCCAACCACAGCCGA<br>AATTGACCTCAAAGAA     |
| H2AFZ         | GGTGGTGGGATCTCACCGTGGGTCCGATTAGCCTTTTCTCTGCCTTGCTTGTGCTTACAGCTTACAGCGGAATTGAAATGGCTGGCGGT<br>AAGGCTGGAAAGGA |
| H2BFS         | AGCAGGTCCACCCGACACCGGCATCTCCTAAGGCCATGGGAATCATGAACTCCTTCGTAACGACATCTTCGAACGCATCGC<br>AGGTGAGGCTTCCCG        |
| H2BFWT        | CGTCTGGACGGTCCCGCAGGTGACCCTACATGTCCGGAGCAACACTTTGAAAACCAAAGACGCTTGGCAGAACCCTGTCTCTT<br>TCCAGAGACAGAGCT      |
| HIST1H1A      | GAGCGTCAAGACTCCGAAAAAGGCTAAAAAGCCTGCGGCAACAAGGAAATCTCCAAGAATCCAAAAAACCCAAAACTGTAA<br>AGCCCAAGAAAGTAGCT      |
| HIST1H1B      | CCAAAGCCGCTAAGCCCAAAGCAGCAAACCTAAAGCTGCAAAGGCCAAGAAGCGGCTGCCAAAAAGAAAGTAGGAAGCTGGC<br>GTGTGAAAACCGCAACA     |
| HIST1H1C      | TTAAAAAGCGGGCGGAACCAACCTAAGAAGCCAGTTGGGGCAGCCAAGAAGCCAAAGAAGCGGGCTGGCGGCGCAACTCCG<br>AAGAAGAGCGCTAAGAA      |
| HIST1H1D      | CTGCTCCACTTGTCTCTACCATTCCTGCACCCGACAGAAAAACACCTGTGAAGAAAAAGGCGAAGAAGGCAGGGCGCAACTGCTG<br>GGAAACGCAAAGCATC   |
| HIST1H2AA     | ATCCATCGTCTGCTTCGTAAGGGAAATATGACAGAGCGGATAGGGGCAGGGCGCACCAGTGTATTTGGCGGCAGTGTAGAGTATC<br>TCACAGCAGAAATCC    |
| HIST1H2AB     | GCCATCATAAGGCCAAGGGAAAGTGAAGAGTTAACGTTTCATGCACTGCTGTTTTTCTGTACAGCAGACAAAATCAGCCTAACAGC<br>AAAGGCTCTTTTCAG   |
| HIST1H2AC     | ACTCGCATCATCCCGGCCACTTGCAGCTGGCCATCCGCAACGACGAGGAGCTCAACAAACTGCTAGGCCGGGTGACCATTGCTC<br>AGGGCGGGCTCCTTC     |
| HIST1H2AE     | ACTAGTCAAATCCGTCAGTGATCCCGAGTCCAGAAACCAAAGGCTCTTTTCAGAGCCACCCACCTTTTCTGTAAAGTGTGGAA<br>TACACATACGATGCC      |
| HIST1H2AG     | ACTGAGGCCACCACAAGGCGAAGGGCAAGTAAGTACTGTACTAGTTTGTGGCAGCTCAAGTAAAATCGAGTCAAACCAACG<br>GCTCTTTTCAGGGCCA       |
| HIST1H2AI     | AAGAAGACCGAGAGCCACCACAAGGCGAAGGGCAAGTAGAAGCCTGGATTAGTTTGCAGCAACTCAATCCCAAAGGAACCAAA<br>GGCTCTTTTCAGAGCCA    |
| HIST1H2AJ     | TGGCGTCTGCCCAACATCCAGGCCGTGCTGCTGCCAAAGAAAACTGAGAGGCCACCACAAGACTAAGTAAAGACCGAGTTGAAA<br>AGCGCATAAAAAACAAA   |
| HIST1H2AK     | ATCCAGGCCGTGCTGCTGCCAAGAAAACTGAGAGGCCACCACAAGGCCAAGGGCAAGTAGCGGGGCTGGAGCAGTTCATTACTC<br>ATACCTCGGTCCAAAC    |
| HIST1H2AL     | GCTACTGCCCAAGAAGACCGAGAGTACCACAAGGCCAAAGGCAATAATGTCTCCATAGAATCACTTCCAATACAACGGCTC<br>TTTTACAGAGCCACCTA      |
| HIST1H2A<br>M | CGGTGTTCTGCCTAACATCCAGGCCGTACTGCTCCCAAGAAGACTGAGAGGCCACCACAAGCTAAGGGCAAGTAAGGGCTGAA<br>CTTTAAAAATGTAAAC     |
| HIST1H2BB     | CTGTGCGCTGCTGCTGCCTGGGGAGCTGGCTAAGCATGTGTGTCCGAGGGCACTAAGGCAGTTACCAAGTACACTAGCTCTAA<br>ATAAGTGCTTATGTA      |
| HIST1H2BC     | GCTGGCCAAGCACGCCGTGTCGGAGGGCACCAAGGCCGTACCAAGTACACCAGCTCCAAGTAAACATTCCAAGTAAGCGTCTT<br>AACACCTAACCCAAA      |
| HIST1H2BD     | CTCAGGTGTTTGAACAGTGTCTAACTATTAACGCTACGATGCCTGAACCTACCAAGTCTGCTCCTGCCCAAAGAAGGGCTCC<br>AAGAAGGGCGTACT        |
| HIST1H2BE     | GCCAAGCACGCTGTGTGTCAGAGGGCACCAAGGCCGTTACCAAGTACACCAGCTCCAAGTAAACTTGTCCCTGCAACTGCCTTAGTA<br>AACCCAAAGGCTCTT  |
| HIST1H2BF     | GGGAGCTGGCTAAGCACGCCGTGTCAGAGGGCACCAAGGCCGTACCAAGTACACCAGCTCAAGTAAATCTAACGCTTTCATAC<br>CCAATCCAAAGGCT       |
| HIST1H2BG     | GCTGGCCAAGCACGCAGTGTCCGAAGGTACCAAGGCTGTACCAAGTATACAAGCTCCAAGTAAATGTGTGCTTAGGTGCTTTAA<br>AACTCAAAGGCTCTT     |
| HIST1H2BH     | GGGAACTGGCCAAGCACGCCGTGTCGAGGGCACTAAGGCCGTACCAAGTACACCAGCTCCAATAAATGGACGCATGTTCA<br>AACCCAAAGGCTCTT         |

|                |                                                                                                            |
|----------------|------------------------------------------------------------------------------------------------------------|
| HIST1H2BJ      | GCACGCCGTGTCCGAGGGTACTAAGGCCGTCACCAAGTACACCAGCGCTAAGTAAACAGTGAGTTGGTTGCAAACCTCTCAACCCT<br>AACGGCTCTTTAAG   |
| HIST1H2BK      | CACAATTGCCTTCGGTTACCTCATTATCTACTGCAGAAAAGAAGACGAGAATGCAACCATACCTAGATGGACTTTCCACAAGCT<br>AAAGCTGGCCTCTTG    |
| HIST1H2BL      | CAAGCACGCGGTGTCCGAGGGCACCAAGGCCGTCACCAAGTACACCAGCTCCAAGTAAATTCTCAAGCTTTGTCCAACCCAAA<br>GGCTCTTTTCAGAGCC    |
| HIST1H2BM      | ATGCCTGAACCAGTCAAATCTGCTCCAGTCCCTAAAAAAGGCTCCAAGAAGGCCATTAACAAGGCTCAGAAGAAGGATGGAAAAG<br>AAGCGCAAACGCGACCC |
| HIST1H2BN      | GGTGTCCGAGGGCACCAAGGCCGTCACCAAGTACACCAGTTCCAAGTGAGCCCGCCACCGCGGAACGTTCCGGTCAGTCTCGGC<br>CCACACCCCAAAGGCT   |
| HIST1H3A       | GGCTCTGCGCGAGATCCGCCGTTATCAGAAGTCCACTGAACTGCTTATTCGTAAACTACCTTTCCAGCGCTGGTGCAGGAGATT<br>GCGCAGGACTTTAAA    |
| HIST1H3B       | CATCCATGCTAAGCGAGTGACTATTATGCCCAAAGACATCCAGCTCGCTCGCCGATTCGCGGAGAAAAGAGCGTAAATGTAAGA<br>TCACTTTTTCATCAGT   |
| HIST1H3D       | ATCCAGGCTGTACTGCTCCCAAGAAGACTGAGAGTACCACAAAGGCCAAGGCAGGTTTTAGAAGTTCGCAATGGCTCGTACCA<br>AGCAGACTGCTCGCAA    |
| HIST1H3E       | TGACCATCATGCCTAAAGACATCCAGCTTGCCCGCCGATTCGTGGGAGAGGGCGTGAATTGTTTTGAGTACAAACCTTAAATC<br>CAAAGGCTCTTCTCA     |
| HIST1H3F       | CCACCCTACAGGCTGGTACTGTGCGCCCTCCGTGAAATCCGCCGCTATCAGAAATCGACTGAGCTACTGATTTCGAAGCTACCA<br>TTCCAGCGTCTGGTA    |
| HIST1H3G       | CGAGTACTATCATGCCCAAAGGACATTCAGTCTGCTCGCCGATTCGTGGGGAGAGAGCGTAGAGGTTTCCGGGCAGTAATTCTA<br>TCCAACCTAAAAAGG    |
| HIST1H3H       | AAGCGGGTACTATATGCCCAAAGGACATCCAGCTCGCACGTCGTATCCGCCGGCAGAGGGCTTGAGTCTCAAGGACTCACTGA<br>TTACATACCCAAAGGC    |
| HIST1H3I       | GTCACTATTATGCCTAAAGACATCCAGCTTGCGCGCCGATCCGAGGGGAGAGGGCATAAATATTCCTATCAGCCAAAGAAAGTCT<br>GTCCAACCCAAAAG    |
| HIST1H3J       | CTAAGGACATCCAGCTTGCGCGTCGTATCCGTGGCGAGCGAGCATAATCCCTGCTCTATCTTGGGTTCTTAATTGCTTCCAAGC<br>TTCCAAAGGCTCTT     |
| HIST1H4A       | CAAGCGCCACCGCAAGGTGTTCGCTGACAACATCCAGGGCATCACCAAGCCGGCCATCCGGCGTCTGGCCCGCGTGGCGGTGT<br>GAAGCGGATCTCTGGT    |
| HIST1H4B       | TTTGGGTAAGGGAGGTGCCAAGCGTACCAGAAAAGTGTGCTGCGGGATAACATCCAAGGCATACCAAACCGGCCATTCCGGCGCCT<br>TGCTAGGCGTGGTGGG |
| HIST1H4C       | TTGGGGAAGGGTGGTGTCTAAGCGCCATCGTAAGGTGCTCCGGGATAACATCCAGGGCATTACAAAACCGGCTATTCCGCCGTTGG<br>CTCGGCGCGGTGGCG  |
| HIST1H4D       | CGGTAAGGGCGGAAAAGGTCTAGGTAAGGGTGGCGCCAAAGCGTACCCTAAGGTATTGCGTGACAATATCCAAGGAATCACCAA<br>GCCCGCTATCCGCCG    |
| HIST1H4E       | GGATGTGGTCTACGCGCTGAAGAGACAGGGACGCACTCTTTACGGCTTCGGCGGCTAATGCTACCGCTTAAACGACTCAGCATCT<br>CGACTTCCCAAATCA   |
| HIST1H4F       | GTCTACGCGCTCAAGCGCCAGGGACGCACTCTGTACGGCTTTGGTGGCTGAGCCTCACCCGGCTTTTTATTTAACAGCTCACCCA<br>TAAAAGGCCCTTTT    |
| HIST1H4H       | TGTGGTCTACGCGCTGAAGCGACAGGGACGCACTCTTTACGGCTTCGGTGGCTAAGGCTCCTGCTTGTGCACTCTTATTTTCATT<br>TTCAACCAAAGGCC    |
| HIST1H4I       | GCGTGAAGCGCATTTCTGGCCTCATCTATGAGGAGACCCCGGAGTGTTGAAGGTGTTCTGGAGAACGTGATCCGGGACGCCGT<br>GACCTACACGGAGCA     |
| HIST1H4K       | AAGCGCAAGACGGTACCAGCCATGGATGTGGTCTACGCGCTCAAGCGCCAGGGCCGACCCTCTACGGTTTCGGTGGTTGAGCGT<br>CCCTTCTATCAACA     |
| HIST1H4L       | CCGACGCTGGCAGGGCGTGGAGGGGTTAAGCGCATCTCAGGCCTTATATACGAGGAGACACGCGGAGTTCTTAAAGTGTTTTTG<br>GAGAATGTAATCCGC    |
| HIST2H2AA<br>3 | TAACATCCAGGCCGCTACTGCTCCCTAAGAAGACGGAGAGTACCACAAGGCCAAAGGGCAAGTGAGGCTGACGTCGGCCCAAGT<br>GGGCCAGCCCGGCC     |
| HIST2H2AC      | CAGGCCGTTCTGTTACCAAAGAAAACCGAAAGCCAAAGCCAAAAGCAAATAAATGCAGACAAAACAAACGACCAAAGGC<br>TCTTTTAGAGCCACCC        |
| HIST2H2BE      | TGCGAGGCACTTACCATGTAGATACGGGCTCAAAGTACCTCTCAGAGACCTACGTCATCCACTCAGGAATTCGCGCCTCTCAT<br>ACTTGCTGTCTCAT      |
| HIST2H3C       | CCAAGGACATCCAGCTGGCCCGCCGATCCGTGGAGAGCGGGCTTAAAGAGTGGCGGTTCCGGCCGGAGGTTCCATCGTATCCAA<br>AAGGCTCTTTTCAGAG   |

**Table S6: Hypomethylated Genes in C4-12 and LTED**

| Gene       |               |              | C4-12     |           |             | LTED      |           |             |
|------------|---------------|--------------|-----------|-----------|-------------|-----------|-----------|-------------|
| Chromosome | Gene          | Gene ID      | Start     | End       | Fold change | Start     | End       | Fold change |
| 20         | znf217        | nm_006526    | 51632123  | 51632723  | 0.25        | 51632060  | 51632660  | 0.47        |
| 20         | dkfzp564p1772 | al137703     | 45380801  | 45381401  | 0.22        | 45380793  | 45381393  | 0.13        |
| 17         | bcas3         | cr610433     | 56794836  | 56795436  | 0.23        | 56794761  | 56795361  | 0.42        |
| 13         | adprhl1       | nm_138430    | 113155015 | 113155615 | 0.38        | 113154872 | 113155472 | 0.49        |
| 8          | dq574852      | dq574852     | 141640763 | 141641363 | 0.42        | 99357363  | 99357963  | 0.47        |
| 6          | hist1h2be     | nm_003523    | 26291906  | 26292506  | 0.41        | 26291658  | 26292258  | 0.34        |
| 14         | kiaa0325      | ak023747     | 101568983 | 101569583 | 0.45        | 101579590 | 101580190 | 0.43        |
| 16         | znf75a        | nm_153028    | 3294447   | 3295047   | 0.37        | 3294395   | 3294995   | 0.38        |
| 15         | dkfzp761d081  | al157474     | 57158804  | 57159404  | 0.44        | 57158624  | 57159224  | 0.48        |
| 19         | znf615        | nm_198480    | 57209992  | 57210592  | 0.43        | 57202730  | 57203330  | 0.49        |
| 17         | sirt7         | nm_016538    | 77467994  | 77468594  | 0.46        | 77467995  | 77468595  | 0.45        |
| 20         | sulf2         | nm_018837    | 45731900  | 45732500  | 0.47        | 45730645  | 45731245  | 0.45        |
| X          | Znf157        | nm_003446    | 47110480  | 47111080  | 0.48        | 47110445  | 47111045  | 0.45        |
| 6          | Hist1h4d      | nm_003539    | 26296523  | 26297123  | 0.4         | 26296523  | 26297123  | 0.4         |
| 21         | Pred57        | nm_001080845 | 45344128  | 45344728  | 0.47        | 45344172  | 45344772  | 0.47        |
| 20         | dkfzp564p1772 | al137703     | 45374362  | 45374962  | 0.41        | 45380793  | 45381393  | 0.13        |

**Table S7: Significantly differentially methylated histone genes.** Review of significantly differentially hypo-methylated genes in both C4-12 and LTED revealed a strong enrichment for histone genes. We mapped the methylation tracks for each cell line to the UCSC genome browser to visualize the methylation peaks to correlate the results to the MBD-PD array.

| Gene      | Chromosomal location       | MBD-PD array data |      | Visual Inspection of Peaks |       |
|-----------|----------------------------|-------------------|------|----------------------------|-------|
|           |                            | C4-12             | LTED | C4-12                      | LTED  |
| HIST1H1A  | chr6:26,125,239-26,126,019 | NA                | HYPO | HYPO                       | HYPER |
| HIST1H2BB | chr6:26,151,326-26,151,972 | NA                | HYPO | HYPO                       | HYPER |
| HIST1H2BE | chr6:26,292,003-26,292,437 | HYPO              | HYPO | HYPO                       | HYPO  |
| HIST1H3A  | chr6:26,128,697-26,129,165 | HYPO              | NA   | HYPO                       | HYPO  |
| HIST1H3C  | chr6:26,153,618-26,154,067 |                   | HYPO | HYPO                       | HYPO  |
| HIST1H4D  | chr6:26,296,917-26,297,283 | HYPO              | NA   | HYPO                       | HYPO  |
| HIST1H4F  | chr6:26,348,633-26,349,000 | HYPO              | NA   | HYPO                       | HYPER |
