# Supplementary material
Source: PubMed Central journal article supplement (PMC10355979)

S2

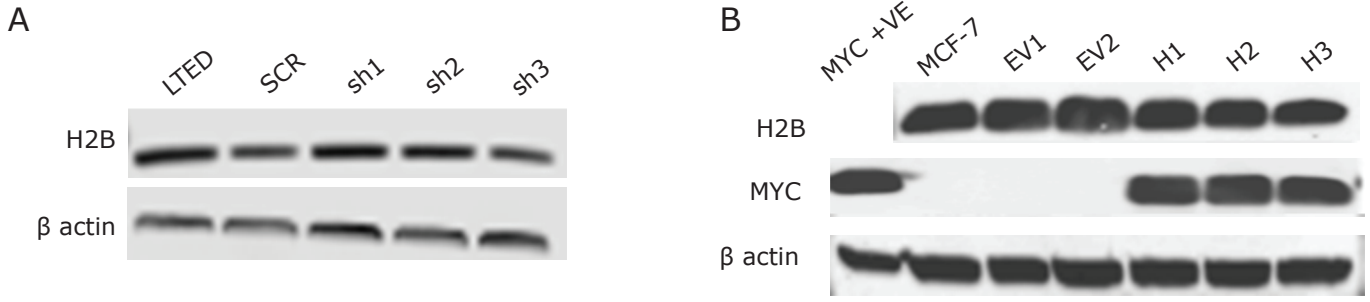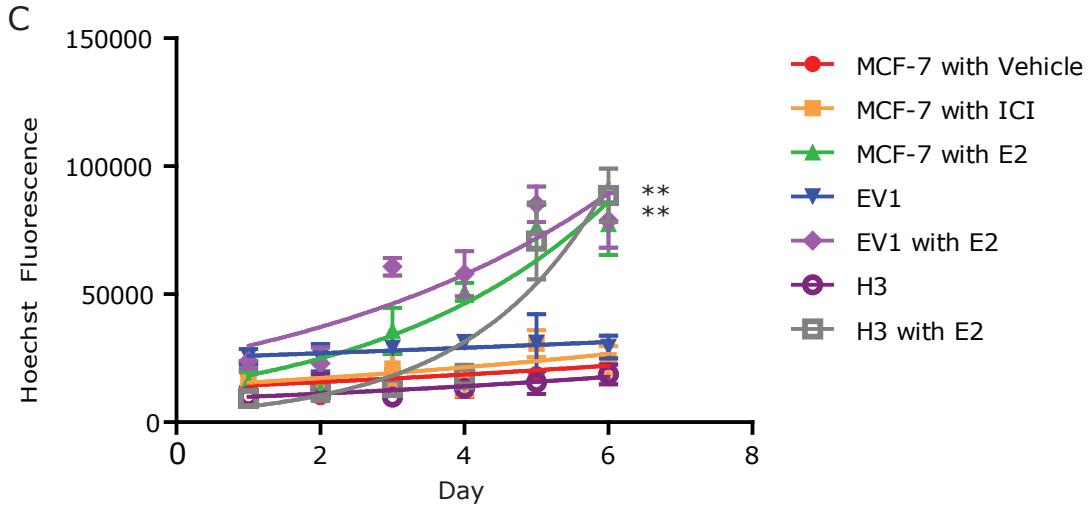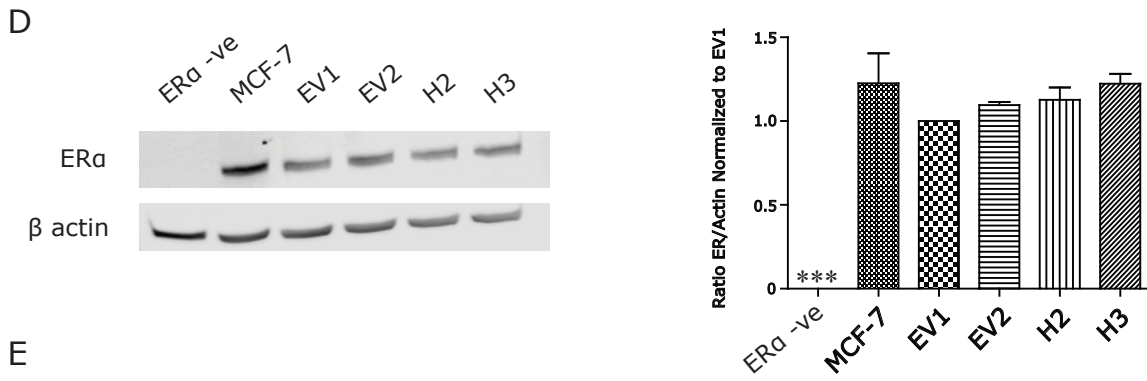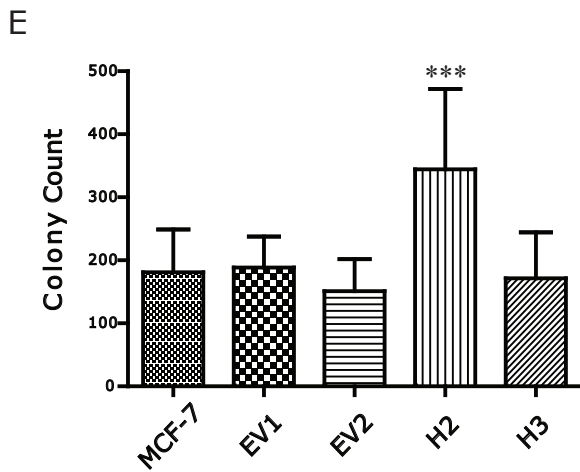

Supplement: 12672_2015_230_MOESM2_ESM.pdf [file 12672_2015_230_MOESM2_ESM.pdf]

S3B

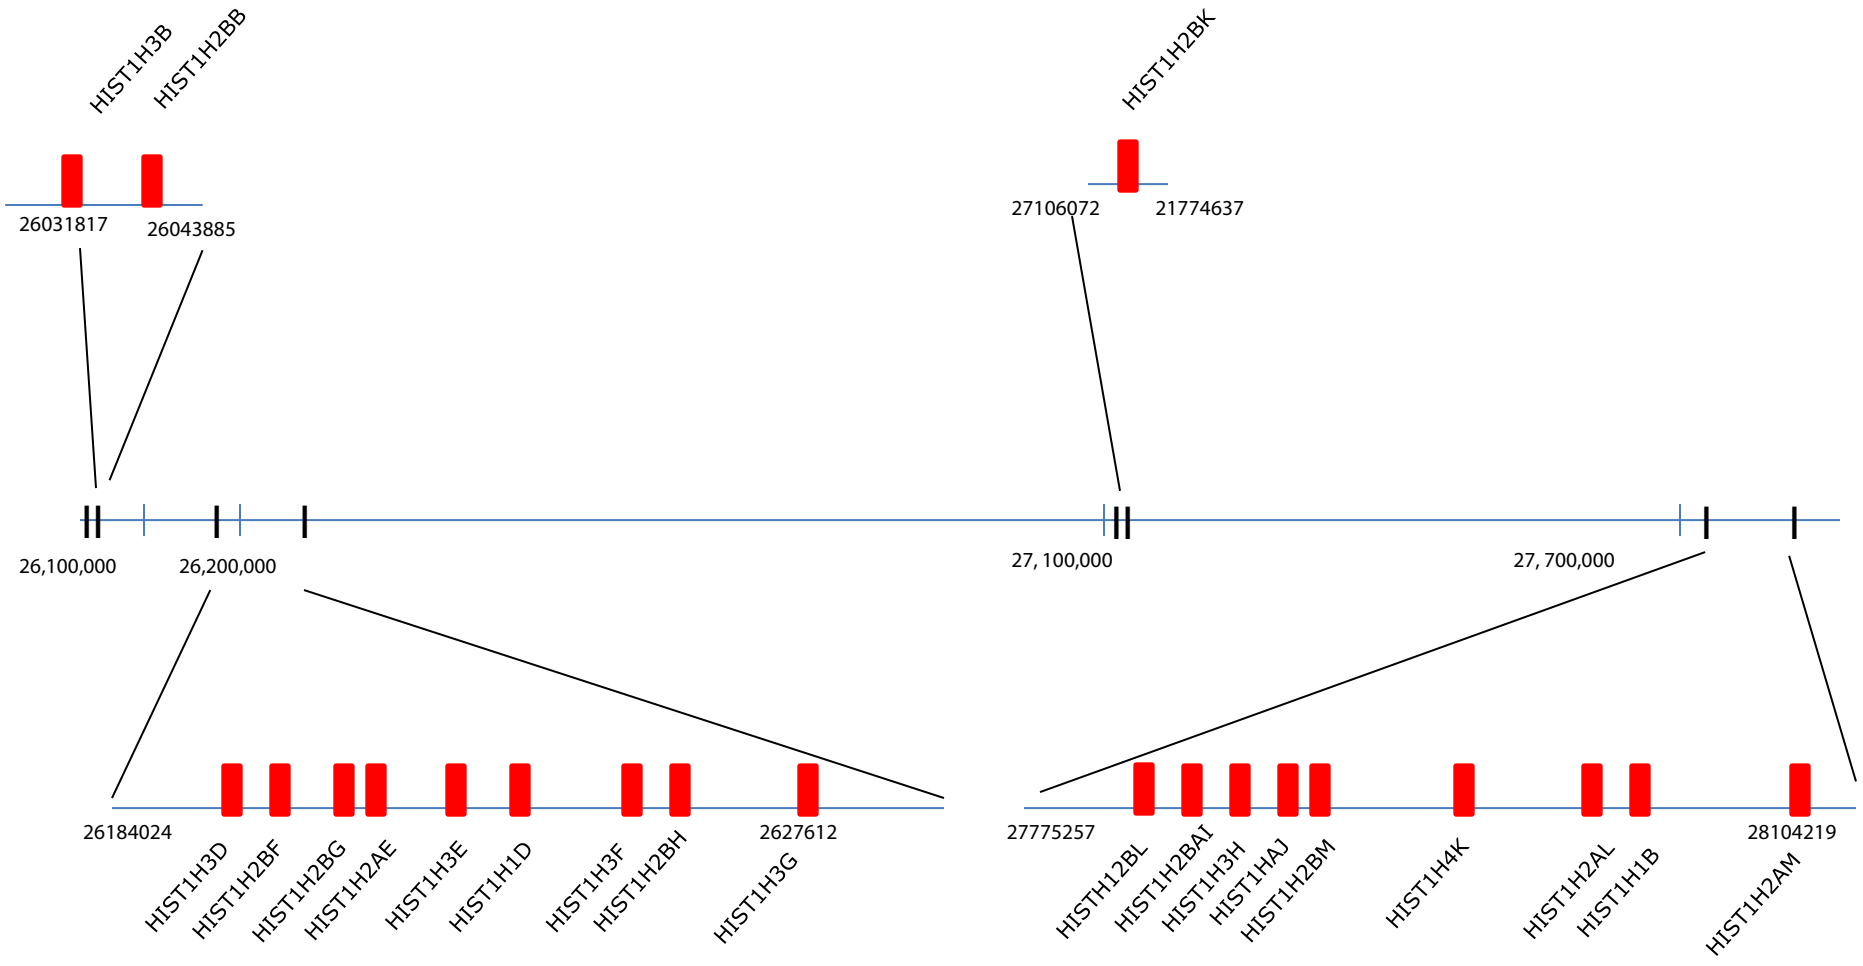

Supplement: 12672_2015_230_MOESM4_ESM.pdf [file 12672_2015_230_MOESM4_ESM.pdf]

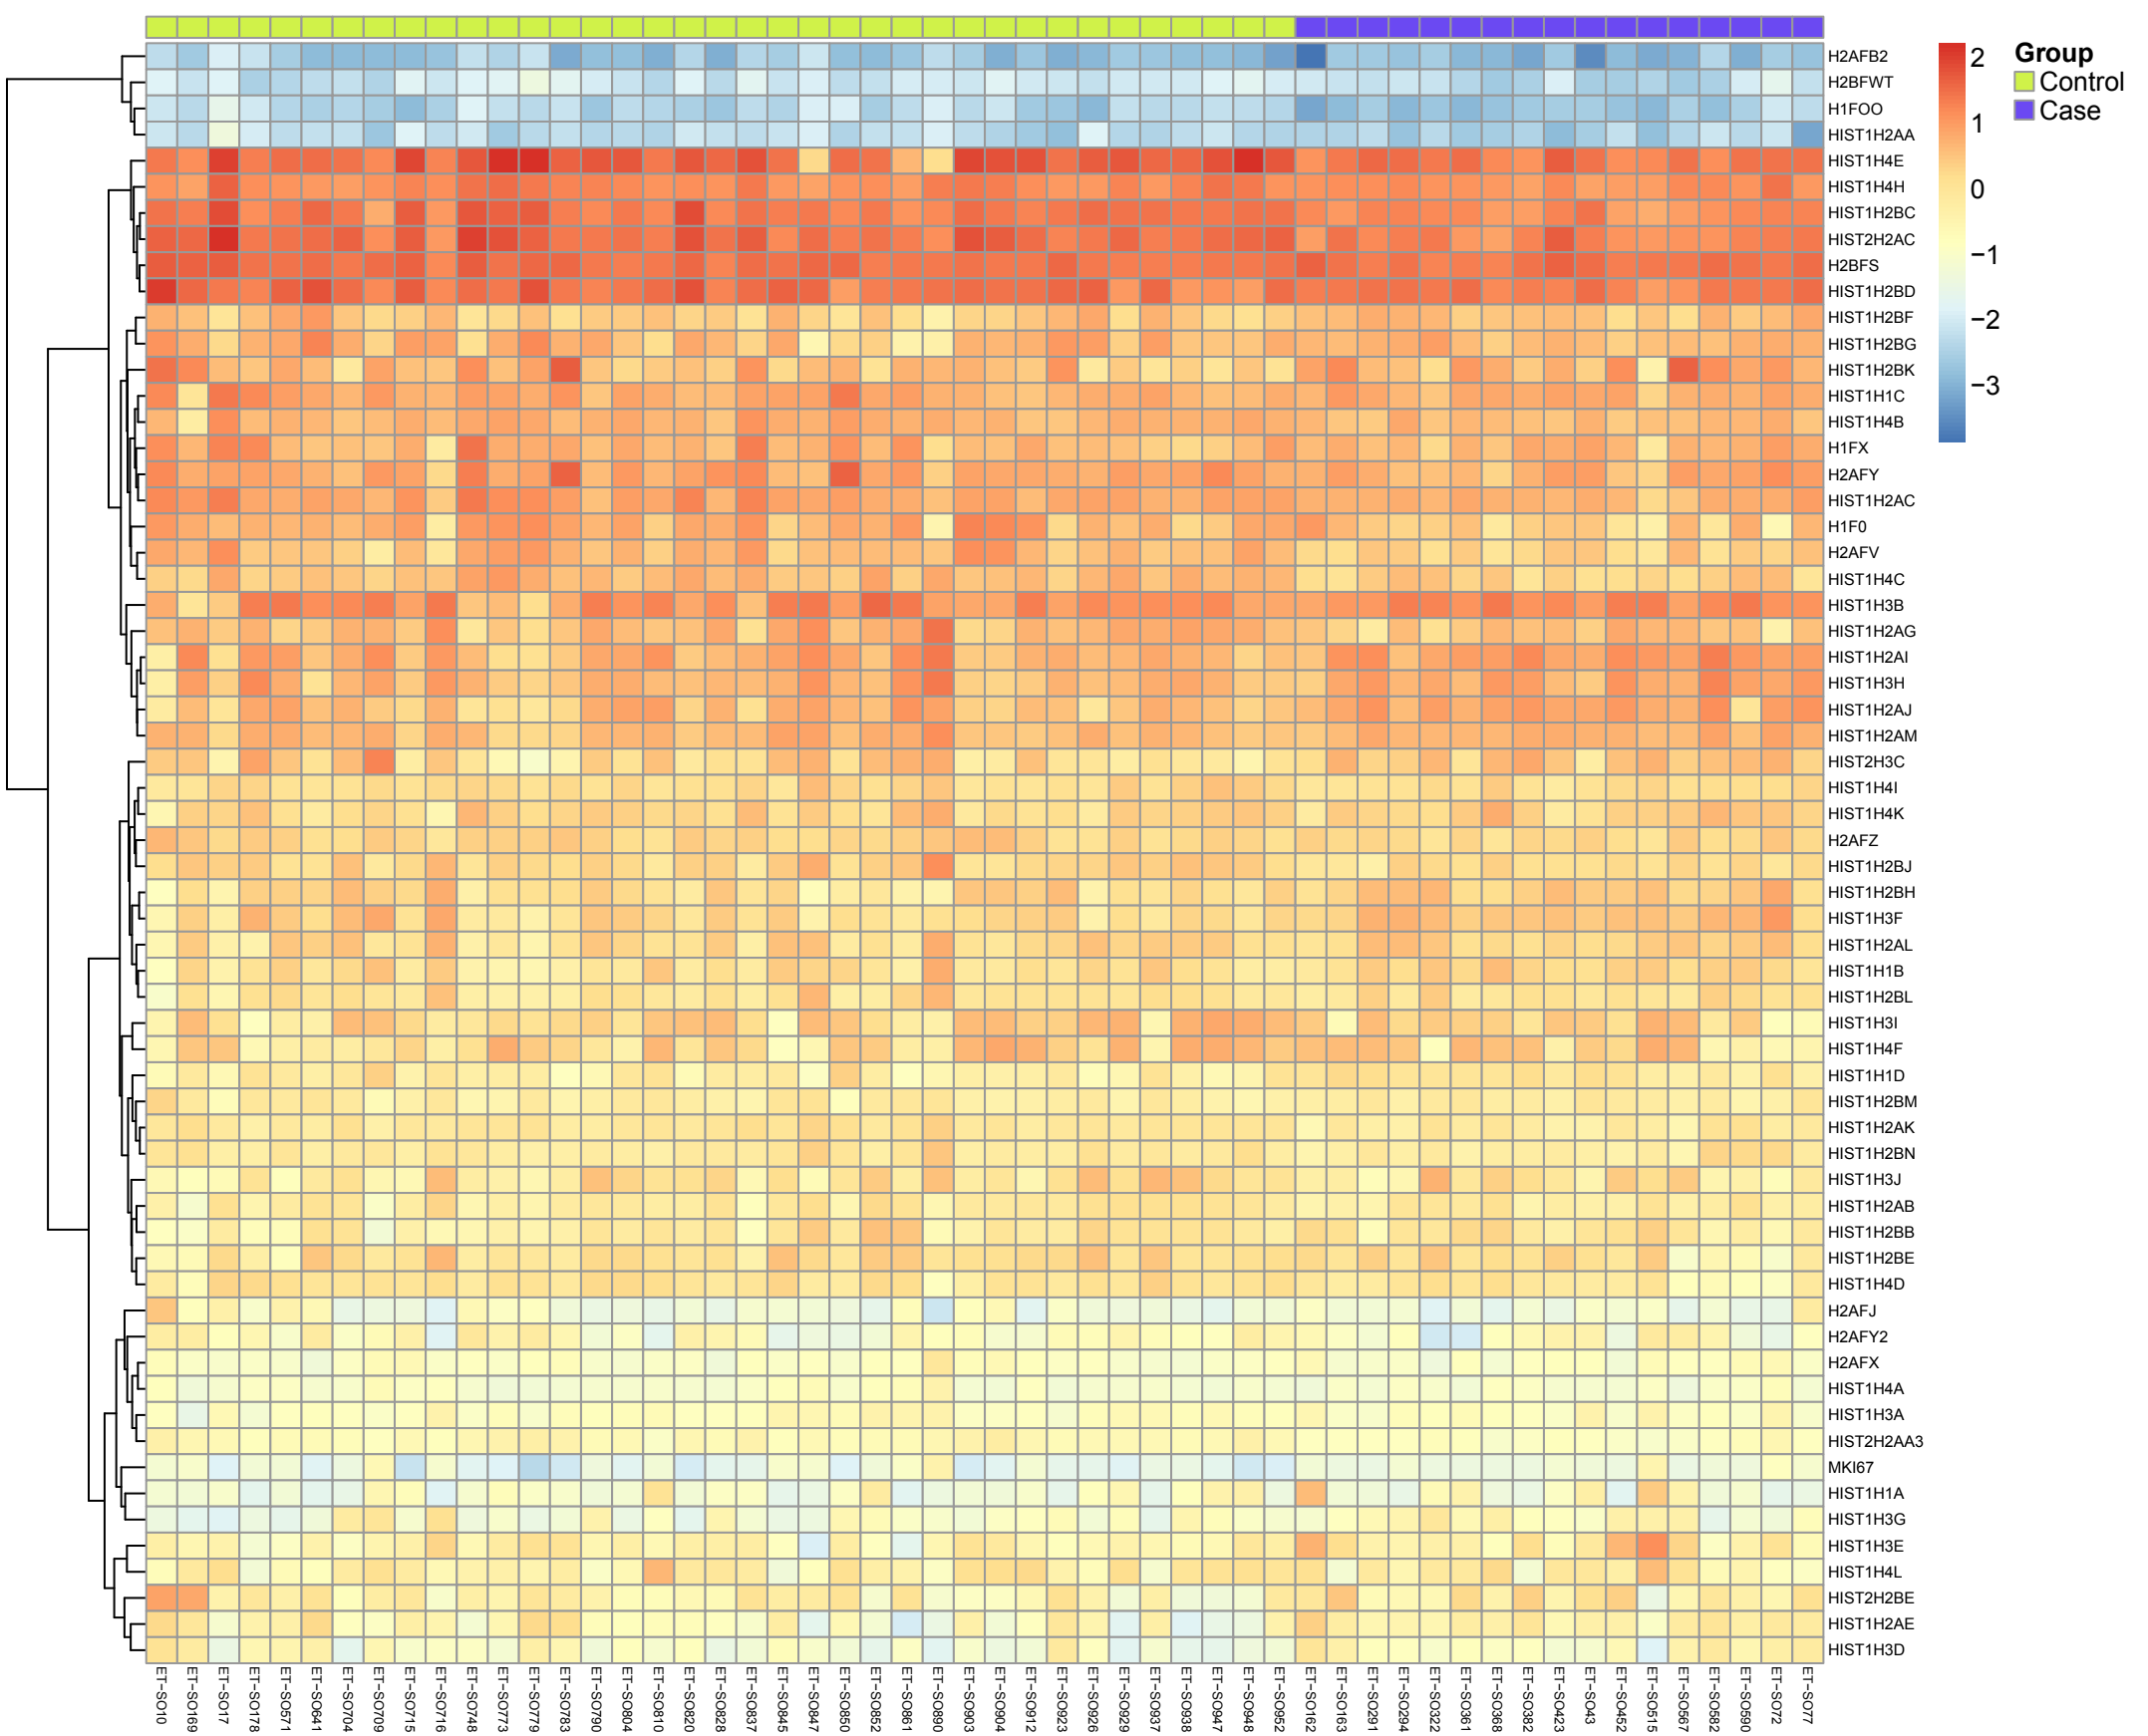

Supplement: 12672_2015_230_MOESM5_ESM.pdf [file 12672_2015_230_MOESM5_ESM.pdf]
